# Supplementary material for: Laser-induced modification of dog-bone-like Au nanorods for accurate growth of well-defined cylindrical structures
Source: Royal Society of Chemistry journal article supplement (doi:10.1039/c6ra16547h), 2016-01-01
Supplement: c6ra16547h1.pdf [file c6ra16547h1.pdf]

## Electronic Supplementary Information

for

Laser-induced modification of dog-bone-like Au nanorods for accurate  
growth of well-defined cylindrical structures

Jiaqi Ma, Chong Zhang, Dameng Wang, Hua Zhang, Linlin Xu, Xiangdong Liu and Ming Chen\*

*School of Physics, Shandong University, Jinan, 250100, China*

[\\*chenming@sdu.edu.cn](mailto:chenming@sdu.edu.cn)

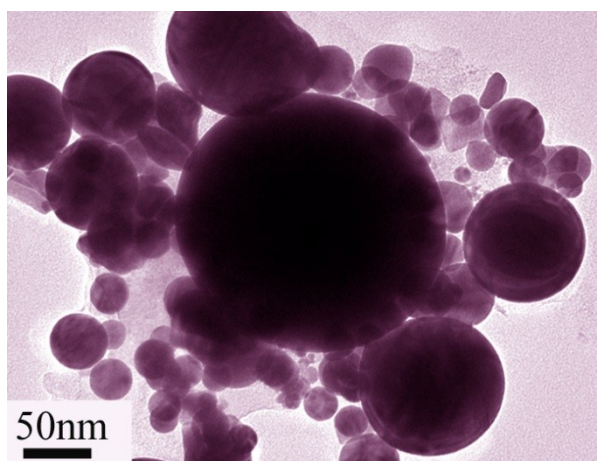

Fig. S1 The TEM image of the poly-dispersed Au nano-spheres instead of Au NRs will be generated by 532 nm low- power ( $\sim 5\text{W}/\text{cm}^2$ ) laser irradiation of the irregular Au NRs

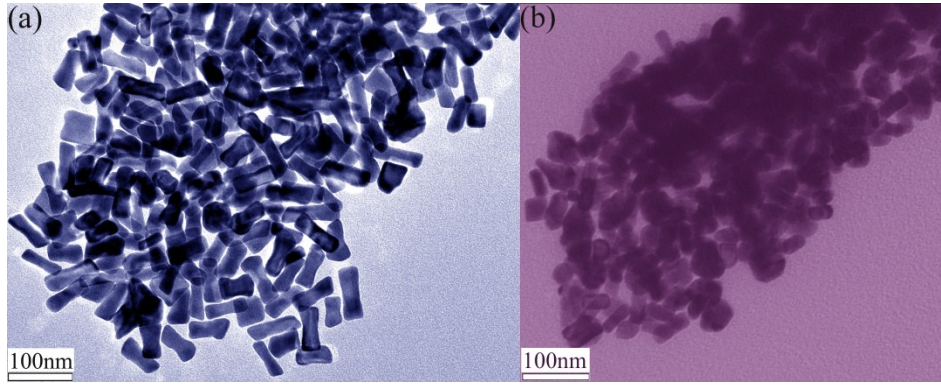

Fig. S2 (a) The typical low-magnification TEM image of pristine irregular Au NRs with high concentration(10mg/L, 10mL) in solution prepared by standard seed-mediated growth approach. (b) The TEM image of the Au NRs obtained by non-focused 1064nm laser ( $\sim 5\text{W}/\text{cm}^2$ ) irradiation of dog-bone-like Au NRs, irradiation time: 100s.

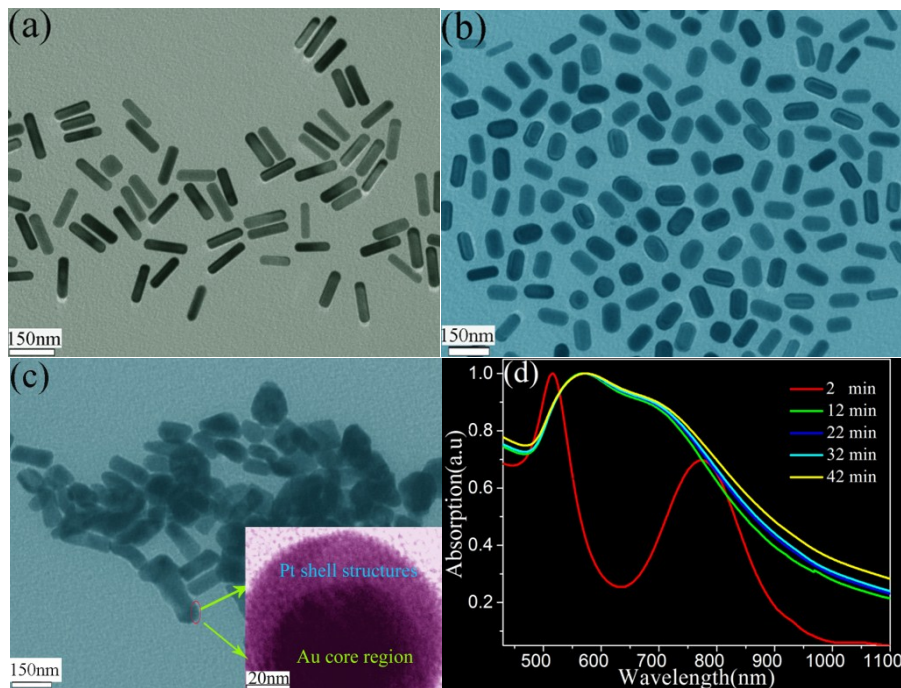

Fig. S3 The TEM images of the irregular shaped hybrid Pt-Ag@Au NRs core-shell structures. After adding Pt ions in solution, reaction time: 2min (a), 22 min (b) and 42 min(c). The inset in (c) shows the typical HRTEM

image of the Pt/Au core-shell structure. (d) UV-visible absorption spectra of core-shell-shaped Pt-Ag@Au NRs at different reaction time.
